# Supplementary material for: Molecular surveillance of Plasmodium falciparum drug-resistance markers in Vietnam using multiplex amplicon sequencing (2000–2016)
Source: PubMed Central journal article supplement (PMC10457381; doi:10.1038/s41598-023-40935-7), 2023-08-25
Supplement: 41598_2023_40935_MOESM1_ESM.pdf [file 41598_2023_40935_MOESM1_ESM.pdf]

# Molecular surveillance of *Plasmodium falciparum* drug-resistance markers in Vietnam using multiplex amplicon sequencing (2000-2016)

## Supplementary Figures and Tables

### Contents

|                                                                                                                                                      |    |
|------------------------------------------------------------------------------------------------------------------------------------------------------|----|
| Supplementary Figures.....                                                                                                                           | 3  |
| Supplementary Figure S1. Sample selection and sample processing flow-chart.....                                                                      | 3  |
| Supplementary Figure S2. Coverage of <i>kelch13</i> gene sequence in <i>pfTSCA</i> assay.....                                                        | 4  |
| Supplementary Figure S3. Detectable frequency of minor clones using parasite mixes.....                                                              | 5  |
| Supplementary Figure S4. Performance of the <i>pfTSCA</i> assay by parasite density.....                                                             | 6  |
| Supplementary Figure S5. Frequencies of <i>arps10</i> -V127M, <i>fd</i> -D193Y and <i>crt</i> -N326S individual alleles in Vietnam (2000-2016). .... | 7  |
| Supplementary Figure S6. K13 mutations and parasite clearance half-life after dihydroartemisinin-piperaquine (DHA-PPQ) treatment.....                | 8  |
| Supplementary Figure S7. Frequency of <i>crt</i> 72-76 haplotype variants as marker of chloroquine resistance in Vietnam (2000-2016).....            | 9  |
| Supplementary Figure S8. Frequency of <i>mdr1</i> -Y184F allele in Vietnam (2000-2016).....                                                          | 10 |
| Supplementary Figure S9. Expected Heterozygosity ( $H_e$ ) in Vietnam (2000-2016). ....                                                              | 11 |
| Supplementary Figure S10. Genetic differentiation ( $F_{ST}$ ) between <i>P. falciparum</i> populations in Vietnam (2000-2016).....                  | 12 |
| Supplementary Figure S11. Principal component analysis (PCA) in study samples from Vietnam (2000-2016).....                                          | 13 |
| Supplementary Tables.....                                                                                                                            | 14 |
| Supplementary Table S1. Design of the multiplex <i>pfTSCA</i> assay and oligonucleotide probes used.....                                             | 14 |
| Supplementary Table S2. Read counts in the multiplex <i>pfTSCA</i> assay for positive and negative controls.....                                     | 15 |
| Supplementary Table S3. Clinical resistance to dihydroartemisinin-piperaquine (DHA-PPQ) reported in Vietnam provinces.....                           | 16 |
| Supplementary Table S4. Read counts in the multiplex <i>pfTSCA</i> assay for study samples (n=635).....                                              | 18 |

|                                                                                                                                         |    |
|-----------------------------------------------------------------------------------------------------------------------------------------|----|
| Supplementary Table S5. Genotyping of study samples by MalariaGEN SpotMalaria .....                                                     | 19 |
| Supplementary Table S6. K13 mutations identified in study samples from Vietnam (2000-2016).....                                         | 20 |
| Supplementary Table S7. Drug resistance markers and Day 3 positivity rate after dihydroartemisinin-piperaquine (DHA-PPQ) treatment..... | 21 |
| Supplementary Table S8. Complexity of infection (COI) in study samples from Vietnam (2000-2016).....                                    | 22 |
| Supplementary Table S9. Discriminant Analysis of Principal Components (DAPC) loadings.....                                              | 23 |

## Supplementary Figures

**Supplementary Figure S1. Sample selection and sample processing flow chart.** DBS, dried blood spots; CNV, copy number variation; sWGA, selective whole genome amplification.

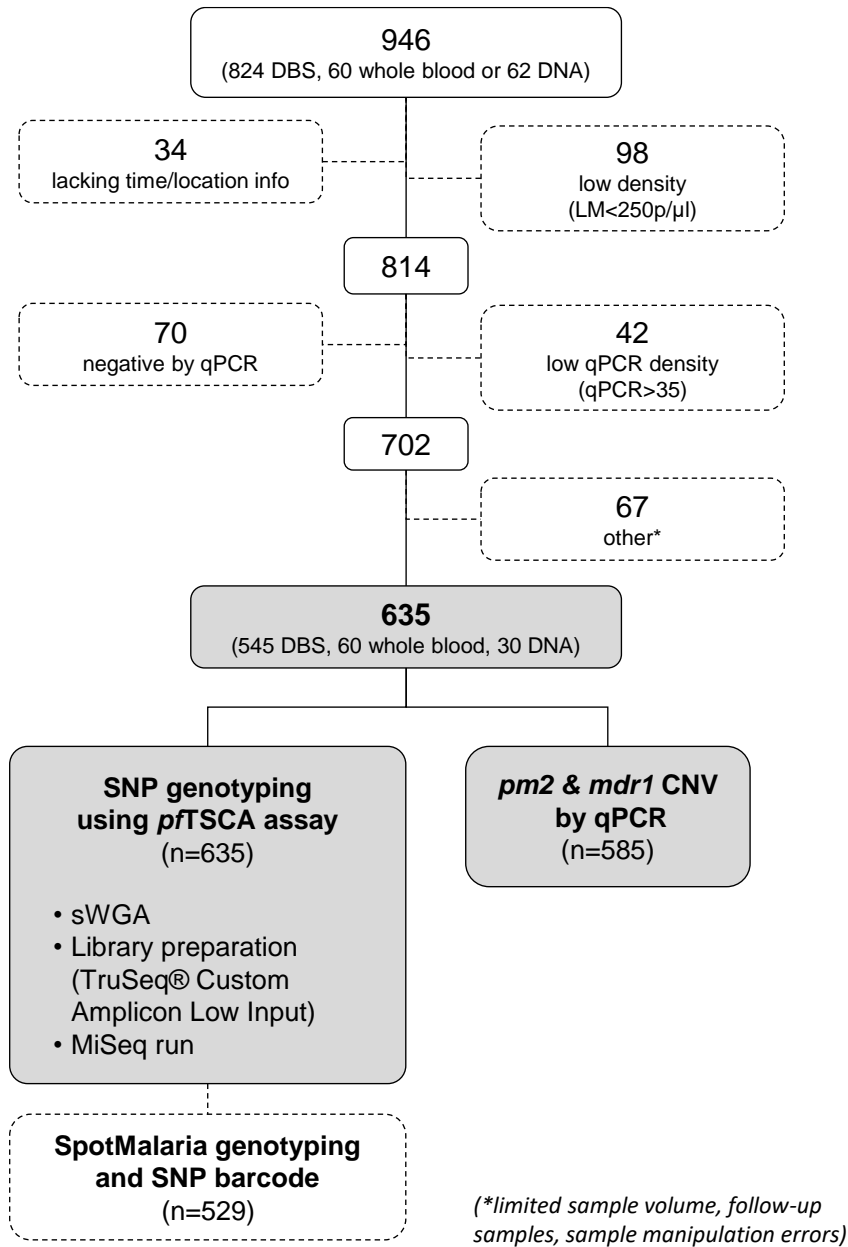

**Supplementary Figure S2. Coverage of *kelch13* (K13) gene sequence in *pft*SCA assay.** Each black line represents an amplicon of length ranging 226 to 273 bp.

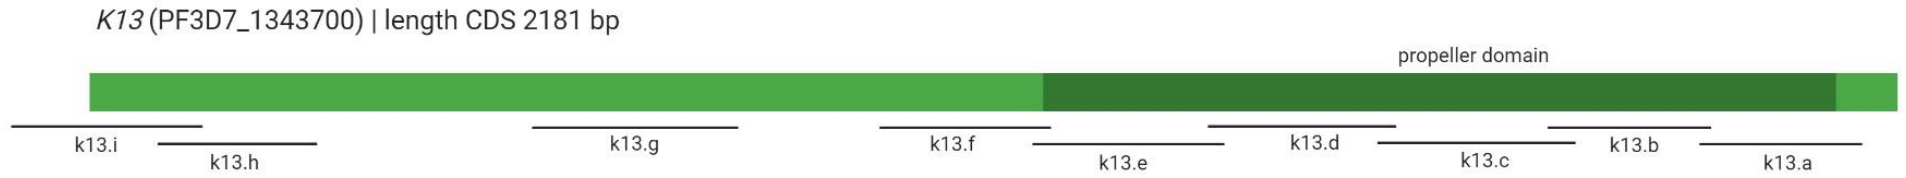

**Supplementary Figure S3. Detectable frequency of minor clones using parasite mixes.** DNA from *P.falciparum* strains 3D7 (reference WT strain), CamWT\_C580Y (K13-C580Y, *arps10*-V127M ) and Dd2 (*crt*-CVIET haplotype and *fd*-D193Y) were mixed at the following ratios: a) 3D7:Cam1251 at 90:10, 95:5 and 99:1; b) 3D7:Dd2 at 50:50, 80:20, 90:10, 95:5 and 99:1; c) Dd2:Cam1251 at 90:10. Bars show the observed ratio of WT (dark or light grey) *versus* mutant allele (colored) for each mix in the TSCA assay.

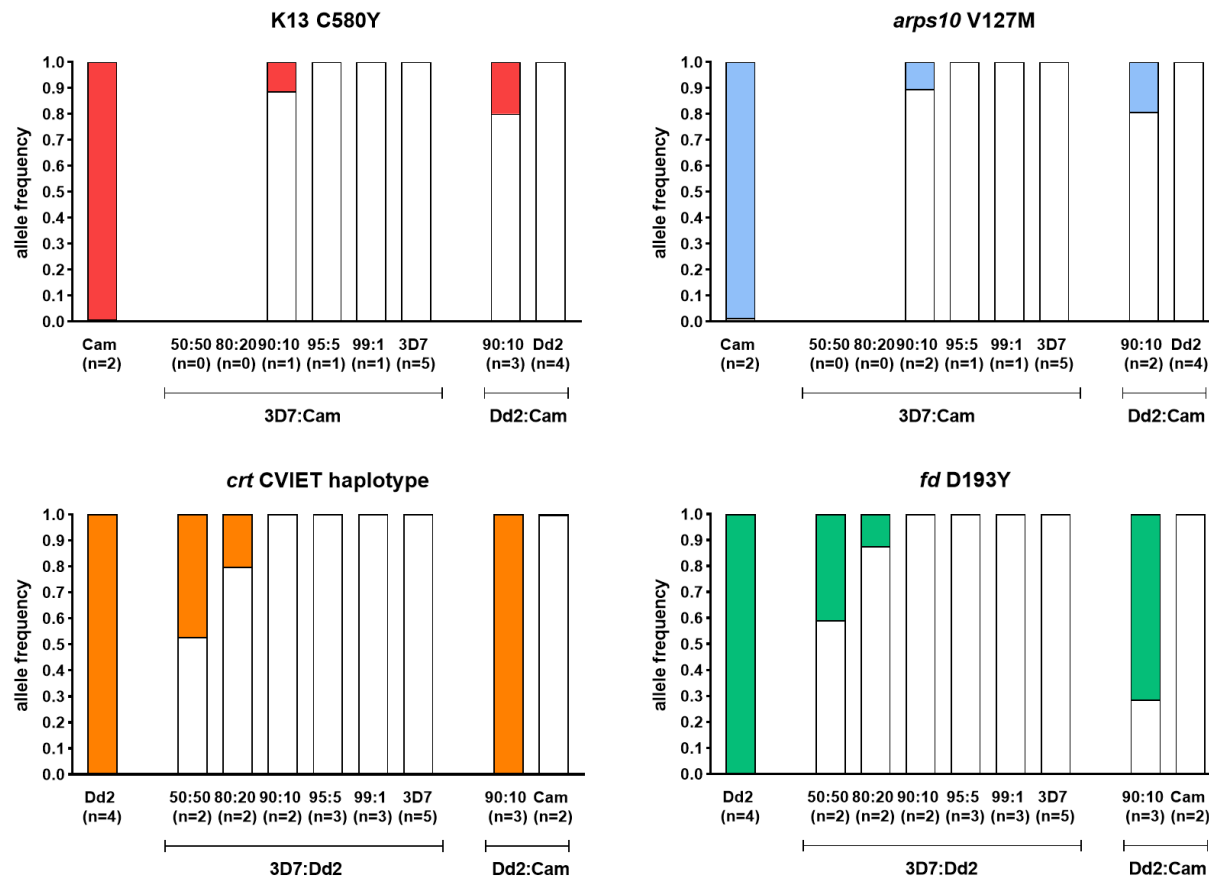

**Supplementary Figure S4. Performance of the *pfTSCA* assay by parasite density.** Plots show the number of amplicons above the read-depth cut-off for each sample (x axis) by parasite density (y axis): A, parasite density as parasites/ $\mu$ l measured by microscopy, all samples; B, parasite density measured by microscopy, dried blood spot samples only; C, parasite density measured by microscopy, whole blood EDTA samples only; D, parasite density quantified by *varATS* qPCR (Ct value) .

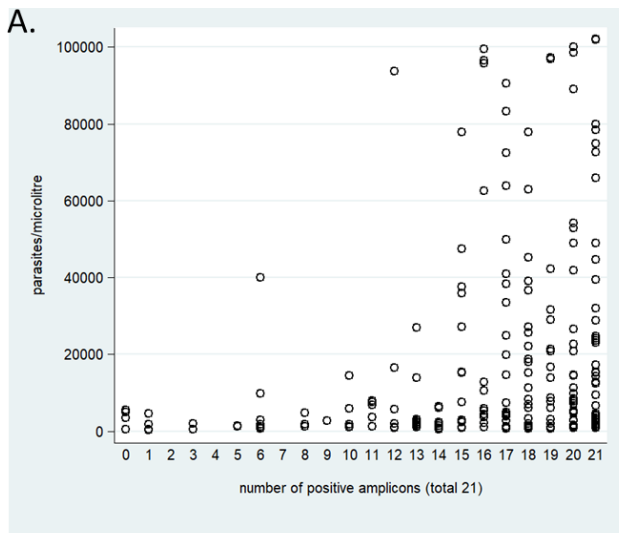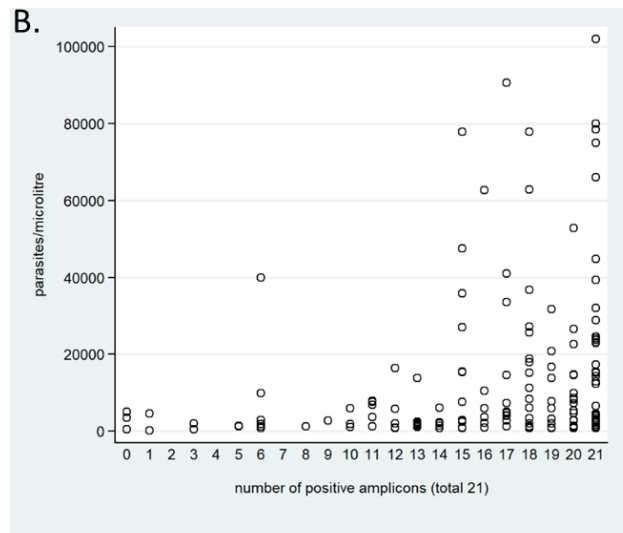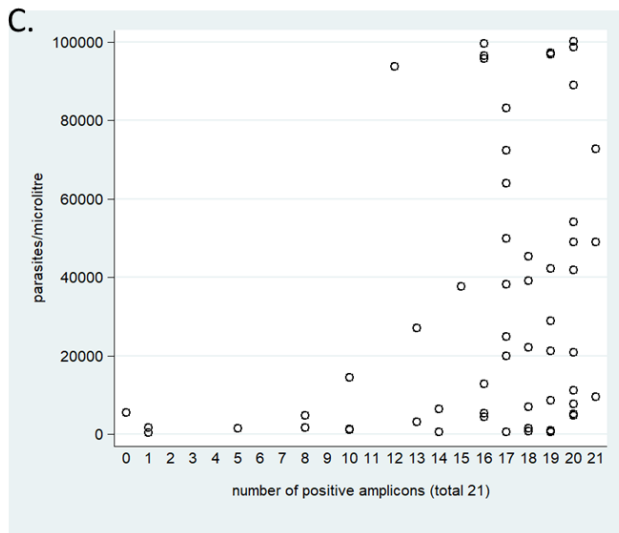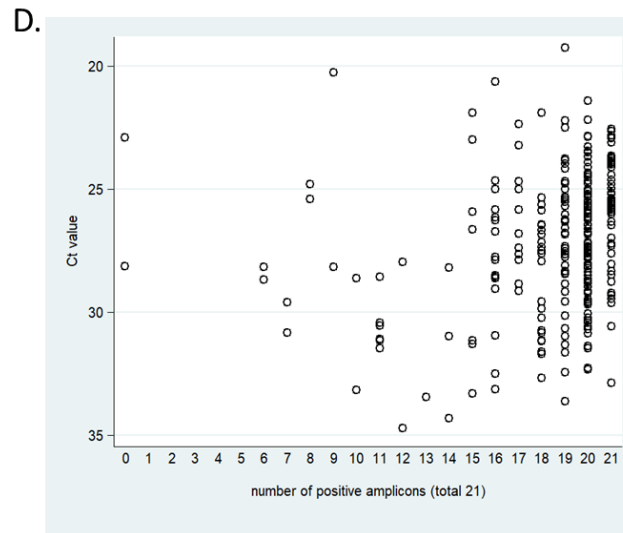

**Supplementary Figure S5. Frequencies of *arps10-V127M*, *fd-D193Y* and *crt-N326S* individual alleles in Vietnam (2000-2016).** Bar charts indicate the percentage of samples with mutant (red) or wild type alleles (green) for either *arps10-V127M* (panel A; N=606), *fd-D193Y* (panel B; N=550) and *crt-N326S* (panel C; N=427). Data is shown by region and years. Region 1: Quang Tri, Quang Nam, Gia Lai and Ratanakiri (Cambodia) provinces; Region 2: Khanh Hoa, Ninh Thuan, and Binh Thuan provinces; Region 3: Binh Phuoc province.

**A. *arps10-V127M***

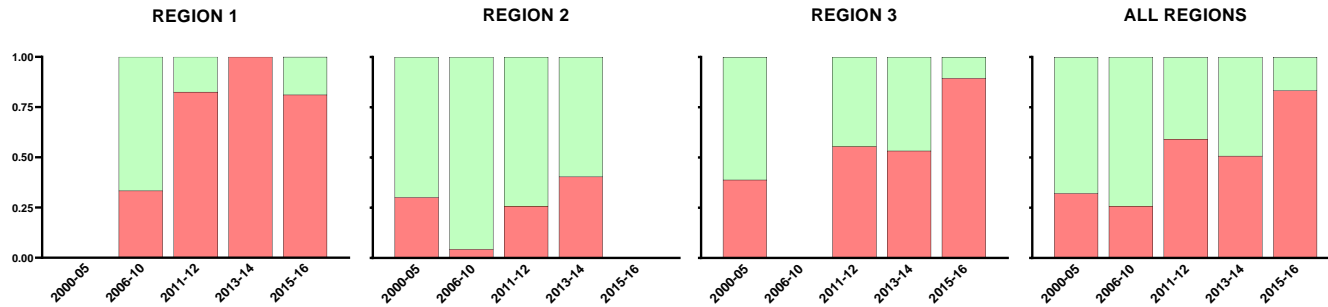

**B. *fd-D193Y***

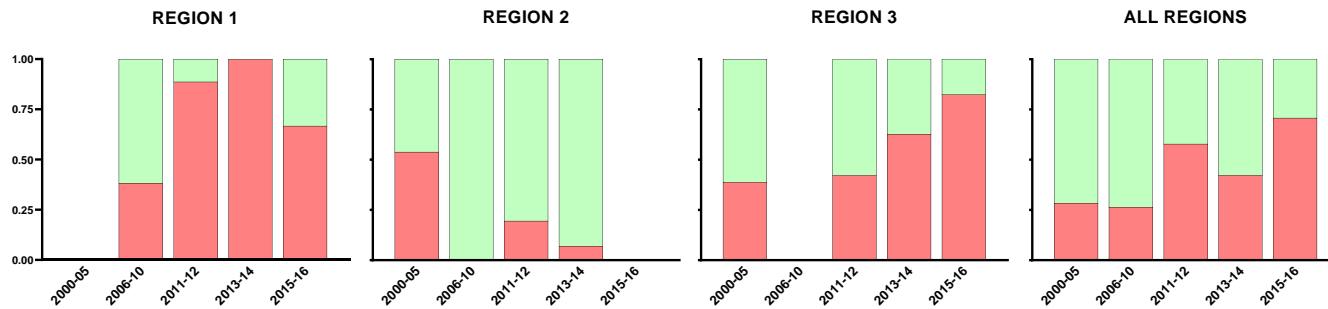

**C. *crt-N326S***

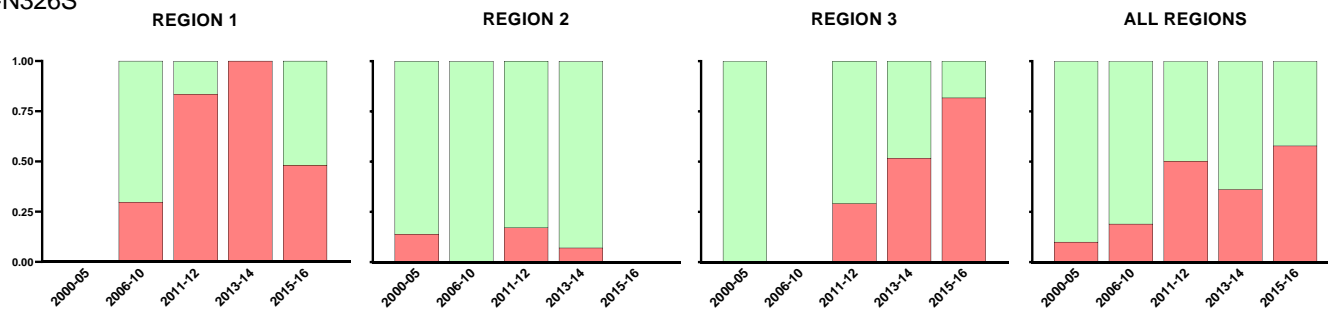

**Supplementary Figure S6. K13 mutations and parasite clearance half-life after dihydroartemisinin-piperaquine (DHA-PPQ) treatment.** Parasite clearance half-life after DHA-PPQ administration stratified by K13 genotype (N=94). Non-validated K13 mutations are shown in white circles. Validated mutations (*i.e.* those with a confirmed association with ART-R) are shown in dark grey circles. WT, wild type.

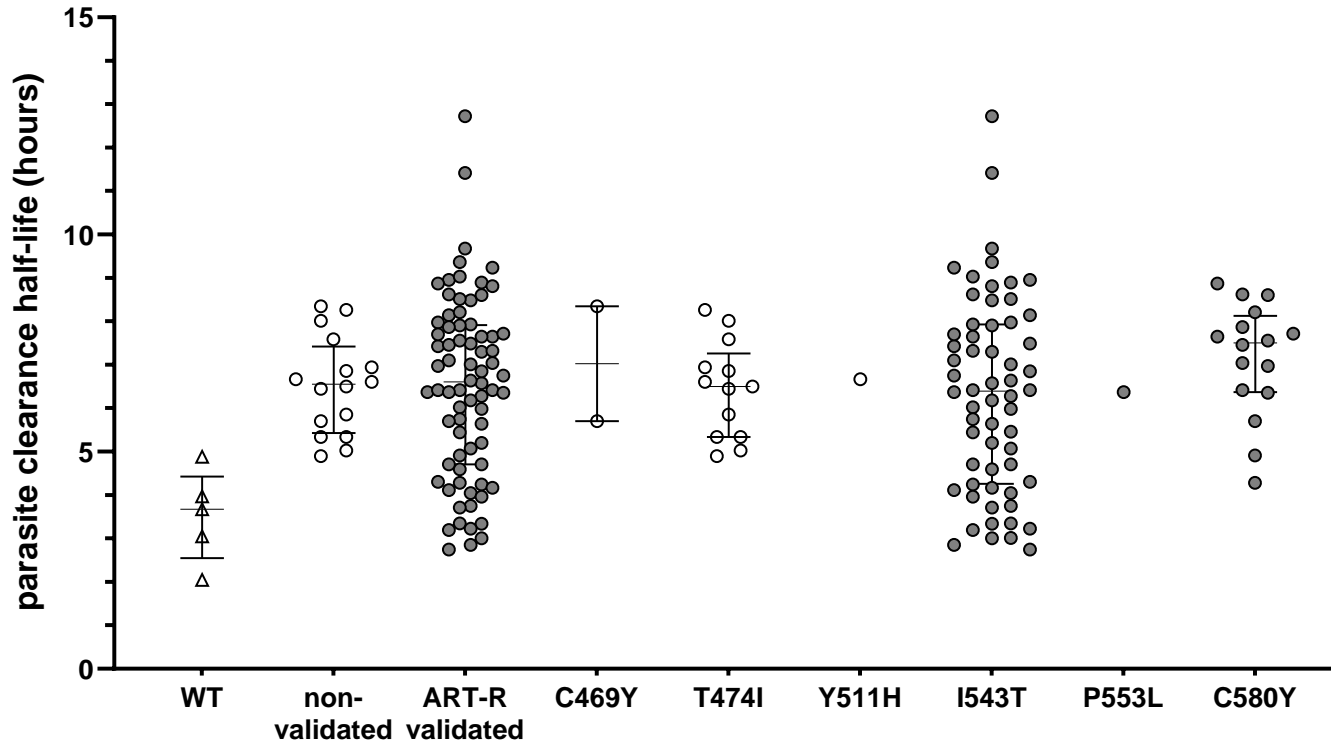



**Supplementary Figure S7. Frequency of *crt* 72-76 haplotype variants as marker of chloroquine resistance in Vietnam (2000-2016).** Bar charts indicate the percentage of samples with mutant (red) or wild type haplotypes (green). Specific haplotypes are indicated with different fill patterns. Data is shown by region and years. Total sample size was N=544. Region 1: Quang Tri, Quang Nam, Gia Lai and Ratanakiri (Cambodia) provinces; Region 2: Khanh Hoa, Ninh Thuan, and Binh Thuan provinces; Region 3: Binh Phuoc province.

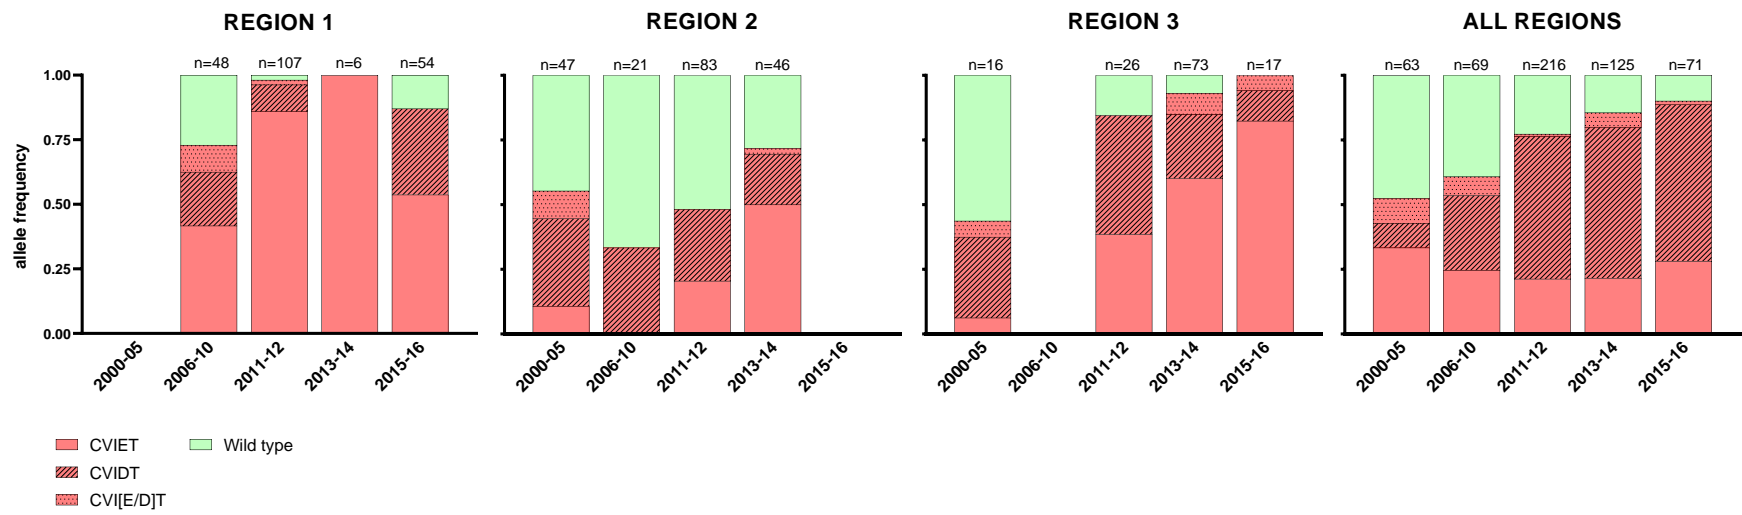

**Supplementary Figure S8. Frequency of *mdr1*-Y184F allele in Vietnam (2000-2016).** Bar charts indicate the percentage of samples with mutant (red) or wild type alleles (green). Data is shown by region and years. The total sample size was N=536. Region 1: Quang Tri, Quang Nam, Gia Lai and Ratanakiri (Cambodia) provinces; Region 2: Khanh Hoa, Ninh Thuan, and Binh Thuan provinces; Region 3: Binh Phuoc province.

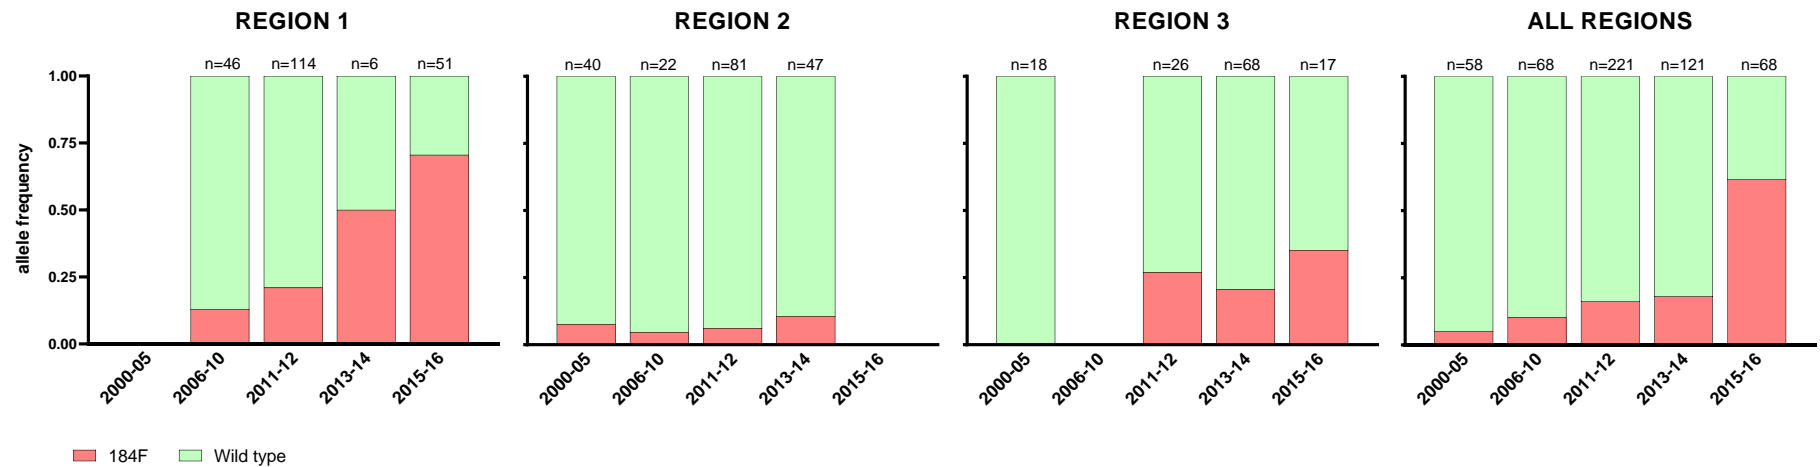





**Supplementary Figure S11. Principal component analysis (PCA) in study samples from Vietnam (2000-2016).** PCA was conducted using all markers in *pfTSCA* (microsatellites *poly- $\alpha$* , *ARAI*, *TA81*, *pk2* and drug resistance markers) and the 101 SNPs barcode. PCA is shown along the first two principal components. Samples are colored by geographical region, and shapes indicate the different periods of collection in years. Samples from Region 1 and years 2011-2012 (blue diamonds) are responsible for the largest variation and cluster separately.

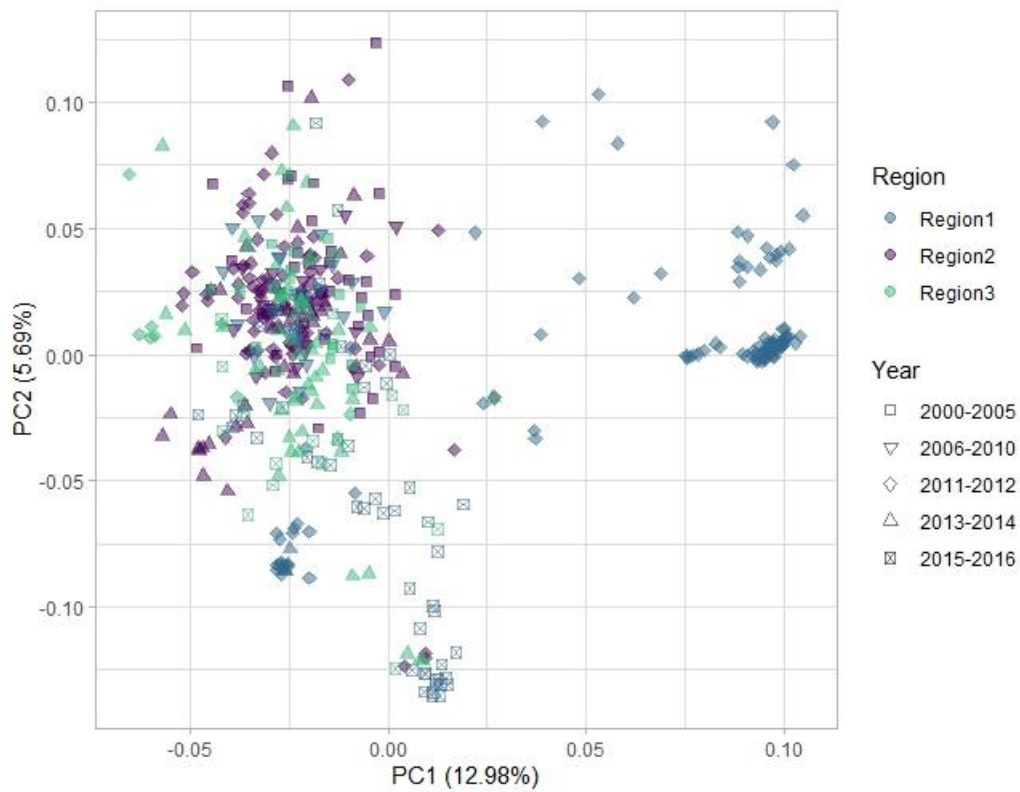

## Supplementary Tables

Supplementary Table S1. Design of the multiplex *pfTSCA* assay and oligonucleotide probes used.

| gene                                                      | target           | % target sequence covered | custom probes sequence and genomic location |             |                |              |              |                                |                                |           |
|-----------------------------------------------------------|------------------|---------------------------|---------------------------------------------|-------------|----------------|--------------|--------------|--------------------------------|--------------------------------|-----------|
|                                                           |                  |                           | amplicon name                               | chromosome  | start position | end position | probe strand | upstream locus-specific oligo  | upstream locus-specific oligo  | size (bp) |
| <b>Markers of ART partial resistance:</b>                 |                  |                           |                                             |             |                |              |              |                                |                                |           |
| Kelch13 (PF3D7_1343700)                                   | codon 1-440      | 73%                       | k13.i                                       | Pf3D7_13_v3 | 1724894        | 1725166      | -            | CTGGTAAAAGAAATGACATGAATTTAGA   | CTAATAAGGCATATGGAATTGTTCCC     | 273       |
|                                                           |                  |                           | k13.h                                       | Pf3D7_13_v3 | 1725112        | 1725370      | +            | TTGGGGGATATGATGGCTCTTCTATTA    | AGCTAGAAGTTCAGGAGCAGCTTTTAA    | 259       |
|                                                           |                  |                           | k13.g                                       | Pf3D7_13_v3 | 1725316        | 1725588      | -            | CGATGATCATATGCTTCTACATTCGGT    | TTGGTAGACATAGGTGTACACATACGC    | 273       |
|                                                           | propeller domain | 100%                      | k13.f                                       | Pf3D7_13_v3 | 1725534        | 1725761      | +            | CCGTAACTATACCCATACCAAAGATT     | AAAGCTTATTTGGAAGTGCTGTATTG     | 228       |
|                                                           |                  |                           | k13.e                                       | Pf3D7_13_v3 | 1725706        | 1725932      | -            | TCTTTCAACAAGGCTTCACTTCACTT     | AGATGTTTCAAAAATAGCTCCACCAAC    | 227       |
|                                                           |                  |                           | k13.d                                       | Pf3D7_13_v3 | 1725876        | 1726112      | +            | GAAGAACATAGGAAACGATTTGATGAA    | GACATACCTAACACAACAAAAGATTCA    | 237       |
|                                                           |                  |                           | k13.c                                       | Pf3D7_13_v3 | 1726214        | 1726478      | +            | GCAGCAAATCTTATAAATGATGATTCTGG  | TGGAAGAGTACGATTGTACAAGAAT      | 265       |
|                                                           |                  |                           | k13.b                                       | Pf3D7_13_v3 | 1726754        | 1726979      | -            | TCATATCAATGGATTCTAATAGGCTATCTT | AAAATTCGAGATACTATTTGCTTTTGTTTT | 226       |
|                                                           |                  |                           | k13.a                                       | Pf3D7_13_v3 | 1726922        | 1727148      | +            | AGGCGTAAATATTCGTGTTATAATTTCTC  | CTATGACGTATGATAGGGAATCTGGTG    | 227       |
| <b>Modulators of ART-R / ART-R genetic background:</b>    |                  |                           |                                             |             |                |              |              |                                |                                |           |
| arps10 (PF3D7_1460900)                                    | V127M            | 100%                      | arps10                                      | Pf3D7_14_v3 | 2481043        | 2481307      | +            | AACCCACAAATCTGGGTAATTTCACTG    | TGGGGAGATCGCAAAAAGGTAATCT      | 265       |
| fd (PF3D7_1318100)                                        | D193Y            | 100%                      | fd                                          | Pf3D7_13_v3 | 748269         | 748543       | +            | CGCAGCAAAATTAGTCGAAGGAGAAGT    | TTTGGTATGGATATGATTGAAATGGGG    | 275       |
| crt (PF3D7_0709000)                                       | N326S            | 100%                      | crt.b                                       | Pf3D7_07_v3 | 405332         | 405604       | +            | TGCTATTGCTGGACCTTGATACAAC      | AGAAGGAAAACAATGCGAAGGTTTTCT    | 273       |
| MAL10:688956                                              | MAL10:688956     | 100%                      | MAL10                                       | Pf3D7_10_v3 | 688872         | 689138       | +            | ATGGAACATTTATGCCATCAACATTT     | TTCATATTAATTCGCCATTTCATTACA    | 267       |
| RAD5-hom. (PF3D7_1343400)                                 | S1158A (MAL13)   | 100%                      | MAL13                                       | Pf3D7_13_v3 | 1718263        | 1718507      | +            | TGAGTTAAATGGAAATAATCGTCTGCA    | CTCATTGGAAATGATCTACTTTACTAAAAC | 245       |
| <b>Markers of resistance to other antimalarial drugs:</b> |                  |                           |                                             |             |                |              |              |                                |                                |           |
| crt (PF3D7_0709000)                                       | 72-76_CVI[E/D]T  | 100%                      | crt.a                                       | Pf3D7_07_v3 | 403525         | 403756       | +            | TTGAATTTCCCTTTTTATTTCCAAATAAGG | AAAATAAGTTTAAACACATGAGCACATTT  | 232       |
| mdr1 (PF3D7_0523000)                                      | Y184F            | 100%                      | mdr1                                        | Pf3D7_05_v3 | 958410         | 958638       | +            | TCTCCACAATAACTTGCAACAGTTCTT    | AACCTAAAAGGAACTGGCATATGTAA     | 229       |
| <b>Markers of population structure:</b>                   |                  |                           |                                             |             |                |              |              |                                |                                |           |
| poly- $\alpha$ (PF3D7_0411900)                            | (AAT)11-20       | 100%                      | MS_poly- $\alpha$                           | Pf3D7_04_v3 | 532155         | 532407       | +            | TTGATTGTATTGTGGAAGATAAAAAGAGT  | GACGATGGACCCAAAAGATCGAACA      | 253       |
| ARAI1 (PF3D7_1110400)                                     | (AAT)9-12        | 100%                      | MS_ARAI1                                    | Pf3D7_11_v3 | 416186         | 416426       | +            | TTTTGGTCAAGTGGTACAGATCTTTTT    | GGTATTGATATGTACATTTGAACCTC     | 241       |
| TA81 (PF3D7_0529800)                                      | (AAT)7-15        | 100%                      | MS_TA81.a                                   | Pf3D7_05_v3 | 1214217        | 1214449      | +            | TCATACATTTACACAACACAGGATTA     | TTGCTGTAATCTTTCATACTTGCTGA     | 233       |
|                                                           |                  |                           | MS_TA81.b                                   | Pf3D7_05_v3 | 1214393        | 1214648      | -            | AAGGAATGATAACATTAATGGTGATGGT   | TGTGATACACATGATTCAAATTAATCGT   | 256       |
| pk2 (PF3D7_1238900)                                       | (TTA)8-13        | 89%                       | MS_pk2                                      | Pf3D7_12_v3 | 1611177        | 1611401      | +            | AATAGTTATTCCTTTCATCGATACTACGA  | AGCATTATTCGGATTATGTTCTTTATGAA  | 225       |

**Supplementary Table S2. Read counts in the *pFTSCA* assay for positive and negative controls.**

| gene                                                      | target           | amplicon name | negative controls (n=12) |            |    |        |     |     |        | positive controls (n=33) |        |            |       |        |       |       |
|-----------------------------------------------------------|------------------|---------------|--------------------------|------------|----|--------|-----|-----|--------|--------------------------|--------|------------|-------|--------|-------|-------|
|                                                           |                  |               | controls with reads      | read count |    |        |     |     |        | controls above cut-off   |        | read count |       |        |       |       |
|                                                           |                  |               |                          | average    | SD | median | p25 | p75 | max    | n                        | %      | average    | SD    | median | p25   | p75   |
| <b>Markers of ART partial resistance:</b>                 |                  |               |                          |            |    |        |     |     |        |                          |        |            |       |        |       |       |
| Kelch13 (PF3D7_1343700)                                   | codon 1-440      | k13.i         | 1                        | 0          | 0  | 0      | 0   | 0   | 1      | 9                        | 27,3%  | 117        | 141   | 53     | 22    | 117   |
|                                                           |                  | k13.h         | 12                       | 12         | 9  | 8      | 4   | 20  | 27     | 33                       | 100,0% | 15063      | 8281  | 12385  | 9313  | 18830 |
|                                                           |                  | k13.g         | 2                        | 1          | 1  | 0      | 0   | 0   | 4      | 33                       | 100,0% | 555        | 405   | 470    | 234   | 776   |
|                                                           | propeller domain | k13.f         | 7                        | 2          | 3  | 2      | 0   | 2   | 9      | 33                       | 100,0% | 4881       | 3389  | 5035   | 1572  | 7526  |
|                                                           |                  | k13.e         | 9                        | 6          | 7  | 4      | 1   | 10  | 20     | 33                       | 100,0% | 21584      | 16794 | 14519  | 7760  | 30066 |
|                                                           |                  | k13.d         | 11                       | 4          | 5  | 2      | 1   | 5   | 16     | 33                       | 100,0% | 9908       | 5517  | 9802   | 6569  | 13766 |
|                                                           |                  | k13.c         | 9                        | 6          | 6  | 4      | 1   | 10  | 18     | 32                       | 97,0%  | 14830      | 10827 | 15242  | 6938  | 22848 |
|                                                           |                  | k13.b         | 10                       | 4          | 4  | 3      | 1   | 5   | 13     | 33                       | 100,0% | 17918      | 11915 | 14464  | 8207  | 25640 |
| k13.a                                                     | 9                | 4             | 4                        | 3          | 1  | 7      | 15  | 33  | 100,0% | 13096                    | 7489   | 13505      | 9222  | 17723  |       |       |
| <b>Modulators of ART-R / ART-R genetic background:</b>    |                  |               |                          |            |    |        |     |     |        |                          |        |            |       |        |       |       |
| arps10 (PF3D7_1460900)                                    | V127M            | arps10        | 12                       | 25         | 19 | 23     | 6   | 42  | 55     | 33                       | 100,0% | 33801      | 28450 | 27805  | 19451 | 43703 |
| fd (PF3D7_1318100)                                        | D193Y            | fd            | 9                        | 2          | 2  | 1      | 1   | 3   | 5      | 30                       | 90,9%  | 5022       | 4514  | 3993   | 1263  | 5995  |
| crt (PF3D7_0709000)                                       | N326S            | crt.b         | 1                        | 0          | 1  | 0      | 0   | 0   | 2      | 20                       | 60,6%  | 62         | 69    | 36     | 28    | 70    |
| MAL10:688956                                              | MAL10:688956     | MAL10         | 0                        | 0          | 0  | 0      | 0   | 0   | 0      | 16                       | 48,5%  | 297        | 279   | 304    | 26    | 458   |
| RAD5-homol. (PF3D7_1343400)                               | S1158A (MAL13)   | MAL13         | 6                        | 2          | 4  | 1      | 0   | 3   | 14     | 33                       | 100,0% | 6993       | 4828  | 7074   | 2333  | 10060 |
| <b>Markers of resistance to other antimalarial drugs:</b> |                  |               |                          |            |    |        |     |     |        |                          |        |            |       |        |       |       |
| crt (PF3D7_0709000)                                       | 72-76_CVI[E/D]T  | crt.a         | 7                        | 2          | 3  | 2      | 0   | 3   | 9      | 33                       | 100,0% | 1653       | 1542  | 1304   | 236   | 2577  |
| mdr1 (PF3D7_0523000)                                      | Y184F            | mdr1          | 3                        | 1          | 1  | 0      | 0   | 1   | 3      | 33                       | 100,0% | 2868       | 1784  | 2452   | 1777  | 4104  |
| <b>Markers of population structure:</b>                   |                  |               |                          |            |    |        |     |     |        |                          |        |            |       |        |       |       |
| poly-α (PF3D7_0411900)                                    | (AAT)11-20       | MS_poly-a     | 1                        | 0          | 1  | 0      | 0   | 0   | 3      | 30                       | 90,9%  | 789        | 1022  | 521    | 128   | 979   |
| ARAII (PF3D7_1110400)                                     | (AAT)9-12        | MS_ARAII      | 12                       | 45         | 47 | 34     | 3   | 74  | 132    | 33                       | 100,0% | 24839      | 16457 | 22805  | 11787 | 37240 |
| TA81 (PF3D7_0529800)                                      | (AAT)7-15        | MS_TA81.a     | 2                        | 0          | 1  | 0      | 0   | 0   | 2      | 27                       | 81,8%  | 437        | 339   | 527    | 96    | 706   |
|                                                           |                  | MS_TA81.b     | 11                       | 15         | 16 | 10     | 3   | 24  | 44     | 33                       | 100,0% | 10343      | 6102  | 10573  | 4525  | 14651 |
| pk2 (PF3D7_1238900)                                       | (TTA)8-13        | MS_pk2        | 6                        | 3          | 6  | 1      | 0   | 4   | 18     | 31                       | 93,9%  | 2251       | 2339  | 1475   | 311   | 3367  |

**Supplementary Table S3. Clinical resistance to dihydroartemisinin-piperazine (DHA-PPQ) reported in Vietnam provinces.** Treatment failure rate and parasite positivity rate at day 3 after treatment initiation, reported by therapeutic efficacy studies (TES) conducted in different Vietnam provinces. Note that communes and districts where reported TES were conducted may not be the same as those sampled in the present study.

| Geographical regions in data analysis | Administrative divisions |                     | Indicators of <i>in vivo</i> efficacy of DHA-PPQ |                                          |
|---------------------------------------|--------------------------|---------------------|--------------------------------------------------|------------------------------------------|
|                                       | Province                 | Region              | Treatment failure (%) <sup>1</sup>               | Day 3 positivity (%)                     |
| Region1                               | Quang Tri                | North Central Coast | 0% (2015) <sup>2</sup>                           | 27% (2015) <sup>2</sup>                  |
|                                       | Quang Nam                | South Central Coast | <10% (2019) <sup>3</sup>                         | 29% (2013) <sup>3</sup>                  |
|                                       | Gia Lai                  | Central Highlands   | 0% (2015) - 40% (2019) <sup>4</sup>              | 39% (2016) <sup>4</sup>                  |
|                                       | Ratanakiri (Cambodia)    | NA                  | 26% (2019) <sup>5</sup>                          | 7%(2013) - 51% (2018) <sup>5,6</sup>     |
| Region2                               | Khanh Hoa                | South Central Coast | <10% (2014) <sup>7</sup>                         | >10% (2014) <sup>7</sup>                 |
|                                       | Ninh Thuan               | South Central Coast | <10% (2015) <sup>7,8</sup>                       | 0-32% (2015) <sup>2,8,9</sup>            |
|                                       | Binh Thuan               | South Central Coast | No TF reported (NIMPE)                           | -                                        |
| Region3                               | Binh Phuoc               | Southeast           | >10% (2015) - >50% (2018) <sup>5,7,10</sup>      | 57% (2015) - 75% (2018) <sup>5,6,8</sup> |

NA: not applicable; TF: treatment failure; NIMPE: National Institute of Malariology, Entomology and Parasitology (Ministry of Health).

#### References in Table S1:

- World Health Organization. Methods for surveillance of antimalarial drug efficacy. <https://www.who.int/publications/i/item/9789241597531> (2009)
- Pau, M. C. *et al.* Clinical impact of the two ART resistance markers, K13 gene mutations and DPC3 in Vietnam. *PLoS One* **14**:e0214667; [10.1371/journal.pone.0214667](https://doi.org/10.1371/journal.pone.0214667) (2019).
- Thriemer, K. *et al.* Delayed parasite clearance after treatment with dihydroartemisinin-piperazine in Plasmodium falciparum malaria patients in central Vietnam. *Antimicrob Agents Chemother* **58**, 7049–7055 (2014).
- Rovira-Vallbona, E. *et al.* Efficacy of dihydroartemisinin/piperazine and artesunate monotherapy for the treatment of uncomplicated Plasmodium falciparum malaria in Central Vietnam. *J Antimicrob Chemother* **75**, 2272–2281 (2020).
- van der Pluijm, R. W. *et al.* Determinants of dihydroartemisinin-piperazine treatment failure in Plasmodium falciparum malaria in Cambodia, Thailand, and Vietnam: a prospective clinical, pharmacological, and genetic study. *Lancet Infect Dis* **19**, 952–961 (2019).
- Ashley, E. A. *et al.* Spread of artemisinin resistance in Plasmodium falciparum malaria. *N Engl J Med* **371**, 411–423 (2014).
- World Health Organization. Artemisinin resistance and artemisinin-based combination therapy efficacy. Status report. <https://apps.who.int/iris/handle/10665/274362> (2018)



8. Thanh, N. V. *et al.* Rapid decline in the susceptibility of *Plasmodium falciparum* to dihydroartemisinin-piperaquine in the south of Vietnam. *Malar J* **16**, 27 (2017).
9. Phong, N. C. *et al.* Susceptibility of *Plasmodium falciparum* to artemisinins and *Plasmodium vivax* to chloroquine in Phuoc Chien Commune, Ninh Thuan Province, south-central Vietnam. *Malar J* **18**, 10 (2019).
10. Phuc, B. Q. *et al.* Treatment Failure of Dihydroartemisinin/Piperaquine for *Plasmodium falciparum* Malaria, Vietnam. *Emerg Infect Dis* **23**, 715–717 (2017).

**Supplementary Table S4. Read counts in the multiplex *pfTSCA* assay for study samples. N=635**

| gene                                                      | target           | amplicon          | samples above cut-off |       | read depth |       |        |      |       |  |
|-----------------------------------------------------------|------------------|-------------------|-----------------------|-------|------------|-------|--------|------|-------|--|
|                                                           |                  |                   | n                     | %     | average    | SD    | median | p25  | p75   |  |
| <b>Markers of ART partial resistance:</b>                 |                  |                   |                       |       |            |       |        |      |       |  |
| Kelch13 (PF3D7_1343700)                                   | codon 1-440      | k13.i             | 321                   | 50,6% | 341        | 1227  | 85     | 27   | 242   |  |
|                                                           |                  | k13.h             | 623                   | 98,1% | 11966      | 20696 | 7475   | 2942 | 14065 |  |
|                                                           |                  | k13.g             | 514                   | 80,9% | 420        | 828   | 205    | 80   | 442   |  |
|                                                           | propeller domain | k13.f             | 585                   | 92,1% | 2700       | 5916  | 1217   | 337  | 3285  |  |
|                                                           |                  | k13.e             | 593                   | 93,4% | 4434       | 6998  | 2647   | 621  | 5865  |  |
|                                                           |                  | k13.d             | 588                   | 92,6% | 4304       | 8749  | 2270   | 580  | 5612  |  |
|                                                           |                  | k13.c             | 574                   | 90,4% | 5192       | 10181 | 2826   | 633  | 6769  |  |
| k13.b                                                     | 572              | 90,1%             | 4021                  | 7731  | 2321       | 442   | 5334   |      |       |  |
| k13.a                                                     | 577              | 90,9%             | 4684                  | 9037  | 2429       | 560   | 6228   |      |       |  |
| <b>Modulators of ART-R / ART-R genetic background:</b>    |                  |                   |                       |       |            |       |        |      |       |  |
| arps10 (PF3D7_1460900)                                    | V127M            | arps10            | 617                   | 97,2% | 26303      | 45580 | 16406  | 4718 | 32865 |  |
| fd (PF3D7_1318100)                                        | D193Y            | fd                | 561                   | 88,3% | 2980       | 7959  | 1082   | 222  | 3017  |  |
| crt (PF3D7_0709000)                                       | N326S            | crt.b             | 436                   | 68,7% | 509        | 1742  | 142    | 48   | 411   |  |
| MAL10:688956                                              | MAL10:688956     | MAL10             | 218                   | 34,3% | 83         | 158   | 44     | 21   | 83    |  |
| RAD5-hom. (PF3D7_1343400)                                 | S1158A (MAL13)   | MAL13             | 526                   | 82,8% | 1608       | 3664  | 494    | 129  | 1556  |  |
| <b>Markers of resistance to other antimalarial drugs:</b> |                  |                   |                       |       |            |       |        |      |       |  |
| crt (PF3D7_0709000)                                       | 72-76_CVI[E/D]T  | crt.a             | 558                   | 87,9% | 3160       | 14465 | 941    | 313  | 2520  |  |
| mdr1 (PF3D7_0523000)                                      | Y184F            | mdr1              | 547                   | 86,1% | 1391       | 4450  | 595    | 224  | 1270  |  |
| <b>Markers of population structure:</b>                   |                  |                   |                       |       |            |       |        |      |       |  |
| poly- $\alpha$ (PF3D7_0411900)                            | (AAT)11-20       | MS_poly- $\alpha$ | 497                   | 78,3% | 555        | 1782  | 147    | 41   | 427   |  |
| ARAII (PF3D7_1110400)                                     | (AAT)9-12        | MS_ARAII          | 617                   | 97,2% | 61570      | 78457 | 36281  | 9288 | 93452 |  |
| TA81 (PF3D7_0529800)                                      | (AAT)7-15        | MS_TA81.a         | 526                   | 82,8% | 585        | 1611  | 248    | 98   | 562   |  |
|                                                           |                  | MS_TA81.b         | 612                   | 96,4% | 14416      | 29924 | 6724   | 2323 | 15274 |  |
| pk2 (PF3D7_1238900)                                       | (TTA)8-13        | MS_pk2            | 584                   | 92,0% | 5838       | 20498 | 1561   | 432  | 5284  |  |

**Supplementary Table S5. Genotyping of study samples by MalariaGEN SpotMalaria.** Tables shows agreement between Sanger sequencing or MassArray and *pf*TSCA results. Genotypes were stratified based on their coincidence with either the major or the minor allele in *pf*TSCA assay.

| gene                       | target           | N    | coincident genotype, n (%)       |                                  | discordant genotype, n (%) |
|----------------------------|------------------|------|----------------------------------|----------------------------------|----------------------------|
|                            |                  |      | with <i>pf</i> TSCA major allele | with <i>pf</i> TSCA minor allele |                            |
| kelch13<br>(PF3D7_1343700) | propeller domain | 68   | 64 (94.1%)                       | 1 (1.5%)                         | 3 (4.4%)                   |
| arps10<br>(PF3D7_1460900)  | V127M            | 415  | 393 (94.7%)                      | 16 (3.9%)                        | 6 (1.4%)                   |
| fd<br>(PF3D7_1318100)      | D193Y            | 410  | 401 (97.8%)                      | 6 (1.5%)                         | 3 (0.7%)                   |
| crt<br>(PF3D7_0709000)     | N326S            | 332  | 327 (98.5%)                      | 2 (0.6%)                         | 3 (0.9%)                   |
| crt<br>(PF3D7_0709000)     | CVI[E/D]T        | 401  | 386 (96.3%)                      | 9 (2.2%)                         | 6 (1.5%)                   |
| mdr1<br>(PF3D7_0523000)    | Y184F            | 394  | 386 (98.0%)                      | 1 (0.2%)                         | 7 (1.8%)                   |
| Total                      |                  | 1626 | 1957 (96.9%)                     | 35 (1.7%)                        | 28 (1.4%)                  |

**Supplementary Table S6. K13 mutations identified in study samples from Vietnam (2000-2016).** Results are presented as the number of mutations (n) out of total number of samples with a valid result (N).

| K13 mutation | All |     |       | 2000-2005 |    |       | 2006-2010 |    |       | 2011-2012 |     |       | 2013-2014 |     |       | 2015-2016 |    |       |
|--------------|-----|-----|-------|-----------|----|-------|-----------|----|-------|-----------|-----|-------|-----------|-----|-------|-----------|----|-------|
|              | n   | N   | %     | n         | N  | %     | n         | N  | %     | n         | N   | %     | n         | N   | %     | n         | N  | %     |
| P443L        | 3   | 578 | 0.5%  | 0         | 67 | 0%    | 0         | 77 | 0%    | 3         | 238 | 1.3%  | 0         | 123 | 0%    | 0         | 73 | 0%    |
| C469Y        | 8   | 578 | 1.4%  | 0         | 67 | 0%    | 0         | 77 | 0%    | 3         | 238 | 1.3%  | 0         | 123 | 0%    | 5         | 73 | 7%    |
| T474I        | 26  | 578 | 4.5%  | 2         | 67 | 3%    | 0         | 77 | 0%    | 21        | 238 | 8.8%  | 3         | 123 | 2.4%  | 0         | 73 | 0%    |
| G484V        | 2   | 564 | 0.4%  | 0         | 60 | 0%    | 0         | 75 | 0%    | 2         | 237 | 0.8%  | 0         | 120 | 0.0%  | 0         | 72 | 0%    |
| <b>Y493H</b> | 9   | 564 | 1.6%  | 0         | 60 | 0%    | 0         | 75 | 0%    | 5         | 237 | 2.1%  | 4         | 120 | 3.3%  | 0         | 72 | 0%    |
| Y511H        | 4   | 564 | 0.7%  | 0         | 60 | 0%    | 0         | 75 | 0%    | 0         | 237 | 0%    | 0         | 120 | 0%    | 4         | 72 | 6%    |
| <b>R539T</b> | 15  | 564 | 2.7%  | 0         | 60 | 0.0%  | 1         | 75 | 1%    | 2         | 237 | 0.8%  | 12        | 120 | 10.0% | 0         | 72 | 0%    |
| <b>I543T</b> | 149 | 564 | 26.4% | 11        | 60 | 18.3% | 28        | 75 | 37.3% | 97        | 237 | 40.9% | 10        | 120 | 8.3%  | 3         | 72 | 4.2%  |
| <b>P553L</b> | 35  | 561 | 6.2%  | 8         | 60 | 13.3% | 0         | 76 | 0%    | 11        | 235 | 4.7%  | 11        | 118 | 9.3%  | 5         | 72 | 6.9%  |
| V568G        | 2   | 561 | 0.4%  | 1         | 60 | 1.7%  | 0         | 76 | 0%    | 0         | 235 | 0%    | 1         | 118 | 0.8%  | 0         | 72 | 0%    |
| <b>C580Y</b> | 85  | 561 | 15.2% | 3         | 60 | 5.0%  | 6         | 76 | 7.9%  | 13        | 235 | 5.5%  | 20        | 118 | 16.9% | 43        | 72 | 59.7% |
| D584V        | 2   | 561 | 0.4%  | 0         | 60 | 0%    | 0         | 76 | 0%    | 0         | 235 | 0%    | 2         | 118 | 1.7%  | 0         | 72 | 0.0%  |
| K607E        | 7   | 561 | 1.2%  | 1         | 60 | 1.7%  | 0         | 76 | 0%    | 5         | 235 | 2.1%  | 0         | 118 | 0%    | 1         | 72 | 1%    |

**Supplementary Table S7. Drug resistance markers and Day 3 positivity rate after dihydroartemisinin-piperaquine (DHA-PPQ) treatment.** The frequency of drug resistance markers to DHA (K13) and PPQ (*pm2* multiple copies) plus marker of resistance to mefloquine (*mdr1* multiple copies) are presented as the number of mutant (n) out of total number of samples with a valid result (N). Differences in the frequency of drug resistance markers by microscopically-detected parasitemia at Day 3 were determined using Chi-2 or Fisher's exact tests. The total sample size was 118, of which 85 corresponded to Quang Nam trial in 2011-2012 and 33 to Gia Lai trial in 2015-2016.

| gene                                      | mutation                | Day 3 - |    |     | Day 3 + |    |      | P-value |
|-------------------------------------------|-------------------------|---------|----|-----|---------|----|------|---------|
|                                           |                         | n       | N  | %   | n       | N  | %    |         |
| <b>Markers of resistance</b>              |                         |         |    |     |         |    |      |         |
| K13 (PF3D7_1343700)                       | Any ART-R validated SNP | 46      | 62 | 74% | 33      | 37 | 89%  | 0.119   |
| pm2 (PF3D7_1408000)                       | >1 copy                 | 3       | 56 | 5%  | 1       | 17 | 6%   | 1.000   |
| mdr1 (PF3D7_0523000)                      | >1 copy                 | 3       | 55 | 5%  | 1       | 17 | 6%   | 1.000   |
| <b>ART-R parasite genetic background:</b> |                         |         |    |     |         |    |      |         |
| arps10 (PF3D7_1460900)                    | 127M                    | 54      | 61 | 89% | 35      | 38 | 92%  | 0.737   |
| fd (PF3D7_1318100)                        | 193Y                    | 49      | 56 | 88% | 35      | 35 | 100% | 0.041   |
| crt (PF3D7_0709000)                       | 326S                    | 23      | 27 | 85% | 20      | 23 | 87%  | 1.000   |

**Supplementary Table S8. Complexity of infection (COI) in study samples from Vietnam (2000-2016).** Data shows the number of single clone infections (*i.e.* COI=1; n) out of total number of samples with a valid result (N). COI was determined from 4 microsatellites in *pf*TSCA (542 samples) or a 101 SNP barcode by MassArray (MalariaGEN SpotMalaria, 468 samples).

|             |             | 2000-2005 |    |       | 2006-2010 |    |       | 2011-2012 |     |        | 2013-2014 |     |        | 2015-2016 |    |       | p-value* |
|-------------|-------------|-----------|----|-------|-----------|----|-------|-----------|-----|--------|-----------|-----|--------|-----------|----|-------|----------|
|             |             | n         | N  | %     | n         | N  | %     | n         | N   | %      | n         | N   | %      | n         | N  | %     |          |
| REGION 1    | MS          | (no data) |    |       | 19        | 58 | 32.8% | 41        | 115 | 35.7%  | -         | -   | -%     | 10        | 49 | 20.4% | 0.153    |
|             | SNP barcode | (no data) |    |       | 22        | 27 | 81.5% | 100       | 107 | 93.5%  | 6         | 6   | 100.0% | 52        | 53 | 98.1% |          |
| REGION 2    | MS          | 11        | 49 | 22.4% | 3         | 23 | 13.0% | 7         | 82  | 8.5%   | 1         | 36  | 2.8%   | -         | -  | -%    | 0.029    |
|             | SNP barcode | 38        | 39 | 97.4% | 15        | 17 | 88.2% | 73        | 80  | 91.3%  | 42        | 45  | 93.3%  | -         | -  | -%    |          |
| REGION 3    | MS          | 0         | 16 | 0.0%  | -         | -  | -%    | 3         | 26  | 11.5%  | 13        | 70  | 18.6%  | 3         | 18 | 16.7% | 0.276    |
|             | SNP barcode | 14        | 17 | 82.4% | -         | -  | -%    | 9         | 9   | 100.0% | 51        | 54  | 94.4%  | 11        | 14 | 78.6% |          |
| All regions | MS          | 11        | 65 | 16.9% | 22        | 81 | 27.2% | 51        | 223 | 22.9%  | 14        | 106 | 13.2%  | 13        | 67 | 19.4% | 0.136    |
|             | SNP barcode | 52        | 56 | 92.9% | 37        | 44 | 84.1% | 182       | 196 | 92.9%  | 99        | 105 | 94.3%  | 63        | 67 | 94.0% |          |

MS, microsatellites

**Supplementary Table S9. Discriminant Analysis of Principal Components (DAPC) allele loadings.** The top contributing alleles in the first 4 components (DA axis) of the DAPC analysis (see Figure 5) are listed with the value of the contribution of each allele to the variation in the corresponding axis.

| position            | allele | loading value | DA axis |
|---------------------|--------|---------------|---------|
| Pf3D7_12_v3_1934745 | G      | 0.038         | 1       |
| Pf3D7_04_v3_891732  | A      | 0.031         | 1       |
| Pf3D7_12_v3_1934745 | A      | 0.028         | 1       |
| kelch_i543t         | mutant | 0.024         | 1       |
| Pf3D7_01_v3_180554  | G      | 0.024         | 1       |
| Pf3D7_14_v3_2625887 | G      | 0.023         | 1       |
| Pf3D7_14_v3_1757603 | A      | 0.023         | 1       |
| Pf3D7_07_v3_619957  | G      | 0.020         | 1       |
| kelch_i543t         | WT     | 0.019         | 1       |
| Pf3D7_01_v3_535211  | C      | 0.017         | 1       |
| Pf3D7_07_v3_1358910 | A      | 0.016         | 1       |
| Pf3D7_09_v3_1379145 | A      | 0.016         | 1       |
| Pf3D7_04_v3_891732  | C      | 0.014         | 1       |
| kelch_t474_a        | WT     | 0.014         | 1       |
| Pf3D7_03_v3_656861  | T      | 0.014         | 1       |
| Pf3D7_13_v3_159086  | A      | 0.013         | 1       |
| kelch_t474_a        | mutant | 0.012         | 1       |
| Pf3D7_14_v3_3046108 | C      | 0.046         | 2       |
| Pf3D7_14_v3_438592  | A      | 0.042         | 2       |
| Pf3D7_14_v3_438592  | C      | 0.032         | 2       |
| Pf3D7_14_v3_3046108 | T      | 0.031         | 2       |
| Pf3D7_11_v3_1815412 | C      | 0.029         | 2       |
| Pf3D7_11_v3_1815412 | G      | 0.027         | 2       |
| Pf3D7_13_v3_159086  | G      | 0.023         | 2       |
| Pf3D7_12_v3_2171901 | T      | 0.022         | 2       |
| Pf3D7_02_v3_376222  | G      | 0.021         | 2       |
| Pf3D7_06_v3_574938  | C      | 0.020         | 2       |
| Pf3D7_08_v3_701557  | G      | 0.018         | 2       |
| Pf3D7_11_v3_1018899 | T      | 0.031         | 3       |
| Pf3D7_14_v3_1757603 | A      | 0.029         | 3       |
| Pf3D7_11_v3_1815412 | C      | 0.028         | 3       |
| Pf3D7_11_v3_1815412 | G      | 0.028         | 3       |
| Pf3D7_11_v3_1802201 | A      | 0.026         | 3       |
| Pf3D7_01_v3_145515  | A      | 0.024         | 3       |
| Pf3D7_09_v3_452690  | A      | 0.022         | 3       |
| Pf3D7_06_v3_574938  | C      | 0.021         | 3       |

|                     |        |       |   |
|---------------------|--------|-------|---|
| Pf3D7_11_v3_1802201 | G      | 0.020 | 3 |
| Pf3D7_01_v3_145515  | T      | 0.019 | 3 |
| Pf3D7_06_v3_574938  | A      | 0.018 | 3 |
| Pf3D7_11_v3_1018899 | C      | 0.016 | 3 |
| kelch_c580y         | mutant | 0.015 | 3 |
| Pf3D7_03_v3_155697  | A      | 0.028 | 4 |
| Pf3D7_03_v3_155697  | G      | 0.023 | 4 |
| Pf3D7_07_v3_1213486 | G      | 0.022 | 4 |
| Pf3D7_11_v3_477922  | T      | 0.021 | 4 |
| Pf3D7_13_v3_2161975 | A      | 0.020 | 4 |
| Pf3D7_12_v3_858501  | A      | 0.018 | 4 |
| Pf3D7_02_v3_839620  | T      | 0.018 | 4 |
| Pf3D7_13_v3_2161975 | T      | 0.018 | 4 |
| Pf3D7_07_v3_619957  | G      | 0.017 | 4 |
| Pf3D7_10_v3_1386850 | T      | 0.017 | 4 |
| Pf3D7_07_v3_1308383 | C      | 0.016 | 4 |
